# Supplementary material
Source: MDPI journal article supplement (https://www.mdpi.com/2076-3417/11/4/1708)
Supplement: s1 [file s1]

Table S1. Median and (interquartile values) of the passive and active Range of Motion (ROM) of the elbow, the Jebsen Hand Function Test (JHFT) score, the Patient-Rated Elbow Evaluation (PREE) score, the Disabilities of the Arm, Shoulder and Hand (DASH) score, and grip force, presented as percentage of the baseline values (pre-intervention). P values were calculated separately for each group using the Friedman test. Where statistical significance was found, the Wilcoxin post hoc test was applied.

|                          |            | Research group (N = 9) |                                |                                |              | Control group (N = 9)            |                                   |                                  |              |
|--------------------------|------------|------------------------|--------------------------------|--------------------------------|--------------|----------------------------------|-----------------------------------|----------------------------------|--------------|
|                          |            | <u>1 month after</u>   | <u>3 months after</u>          | <u>1 year after</u>            | <u>p</u>     | <u>Immediately after</u>         | <u>3 months after</u>             | <u>1 year after</u>              | <u>p</u>     |
| Passive ROM of the elbow | Flexion    | 19.4 (26.8)            | <b>33.3 (20.9)<sup>c</sup></b> | <b>40.4 (23.5)<sup>b</sup></b> | <b>0.016</b> | 20.0 (31.8)                      | <b>18.3 (25.4)<sup>c</sup></b>    | <b>35.7 (41.0)<sup>b</sup></b>   | <b>0.021</b> |
|                          | Extension  | 42.8 (71.4)            | 66.6 (50.0)                    | 83.3 (57.1)                    | 0.311        | 50.0 (83.3)                      | 68.3 (155.2)                      | 91.7 (23.7)                      | 0.057        |
|                          | Supination | 6.2 (21.4)             | 12.5 (41.6)                    | 23.1 (22.7)                    | 0.135        | 0.0 (21.7)                       | 9.1 (12.5)                        | 16.0 (24.2)                      | 0.135        |
|                          | Pronation  | 0.0 (19.8)             | 9.2 (57.3)                     | 12.5 (32.2)                    | 0.144        | 0.0 (17.2)                       | 5.8 (13.3)                        | 12.5 (22.1)                      | 0.150        |
| Active ROM of the elbow  | Flexion    | 16.7 (38.6)            | 35.0 (39.5)                    | 33.3 (47.1)                    | 0.072        | <b>19.4 (34.3)<sup>b,c</sup></b> | <b>20.2 (24.5)<sup>a,c</sup></b>  | <b>38.5 (30.0)<sup>a,b</sup></b> | <b>0.004</b> |
|                          | Extension  | 40.0 (46.1)            | 50.0 (56.2)                    | 62.5 (54.2)                    | 0.025        | 37.5 (50.9)                      | 58.3 (85.5)                       | 81.3 (32.1)                      | 0.028        |
|                          | Supination | 12.5 (45.7)            | 12.5 (48.5)                    | 12.5 (56.6)                    | 0.174        | 8.3 (28.6)                       | 21.4 (29.2)                       | 12.5 (22.7)                      | 0.150        |
|                          | Pronation  | 5.8 (20.6)             | 12.5 (15.1)                    | 12.5 (25.8)                    | 0.276        | 5.8 (40.4)                       | 12.5 (50.0)                       | 0.0 (19.2)                       | 0.819        |
| PREE (%)                 |            | 60.4 (48.8)            | 42.9 (58.4)                    | 80.0 (65.16)                   | 0.717        | <b>7.2 (52.4)<sup>b,c</sup></b>  | <b>58.8 (67.03)<sup>a,c</sup></b> | <b>70.4 (44.7)<sup>a,b</sup></b> | <b>0.006</b> |
| JHFT (%)                 |            | 15.4 (46.3)            | <b>32.1 (26.1)<sup>c</sup></b> | <b>38.9 (31.8)<sup>b</sup></b> | <b>0.018</b> | 28.0 (22.9)                      | <b>24.6 (37.7)<sup>c</sup></b>    | <b>43.3 (23.9)<sup>b</sup></b>   | <b>0.042</b> |
| DASH (%)                 |            | 52.0 (33.17)           | 59.1 (49.6)                    | 75.0 (50.9)                    | 0.717        | <b>35.3 (58.0)<sup>b,c</sup></b> | <b>53.6 (58.8)<sup>a,c</sup></b>  | <b>94.7 (30.8)<sup>a,b</sup></b> | <b>0.018</b> |
| Grip force (%)           |            | 55.5 (144.1)           | 83.9 (87.8)                    | 87.1 (152.1)                   | 0.459        | 26.9 (74.1)                      | 18.2 (85.4)                       | 36.0 (68.1)                      | 0.438        |

<sup>a</sup> Statistically significant differences with the test performed after 1 month.

<sup>b</sup> Statistically significant differences with the test performed after 3 month.

<sup>c</sup> Statistically significant differences with the test performed after 1 year.
